# Supplementary material
Source: ML conference proceedings conference paper supplement (https://openaccess.thecvf.com/content/CVPR_2019/html/Peleg_IM-Net_for_High_CVPR_2019_paper.html)
Supplement: Supplementary file 1 [file Peleg_IM-Net_for_High_CVPR_2019_supplemental.zip]

Archive with 5 entries (5 files):
- 3190-supp.pdf
- Soccer_Bouncing_IMNet_vs_SepConv.avi
- Soccer_Bouncing_IMNet_vs_TOFlow.avi
- Walking_Near_Cam_IMNet_vs_SepConv.avi
- Walking_Near_Cam_IMNet_vs_TOFlow.avi
